# Supplementary material for: Potential Sustainable Slow-Release Fertilizers Obtained by Mechanochemical Activation of MgAl and MgFe Layered Double Hydroxides and K2HPO4
Source: PubMed Central journal article supplement (PMC6410234; doi:10.3390/nano9020183), 2019-02-01
Supplement: nanomaterials-09-00183-s001.pdf [file nanomaterials-09-00183-s001.pdf]

## Potential sustainable slow-release fertilizers obtained by mechanochemical activation of MgAl and MgFe layered double hydroxides and $K_2HPO_4$ .

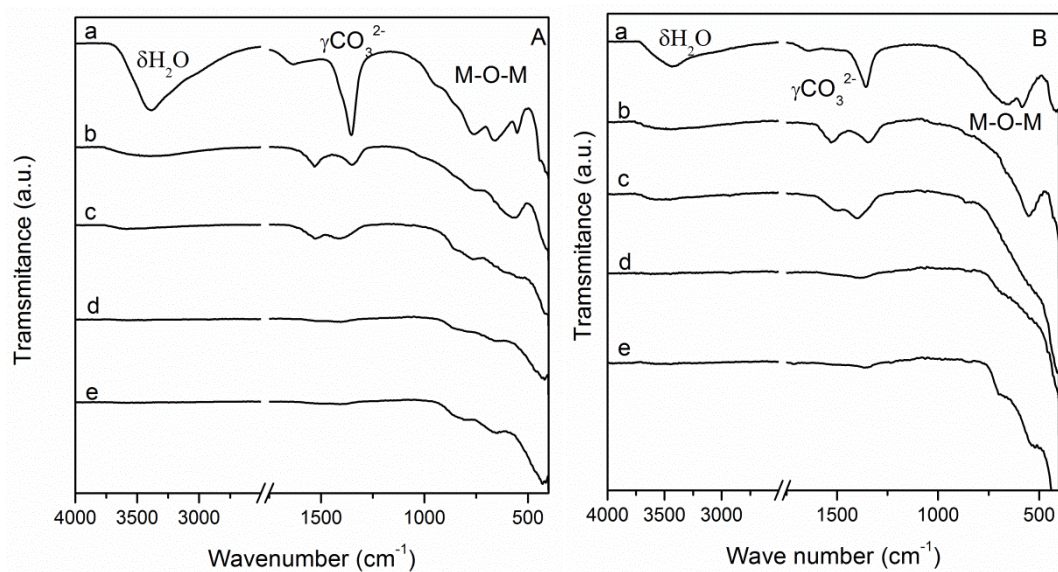

**Figure S1.** FTIR data of A)  $Mg_2Al(OH)_6(CO_3) \cdot 3H_2O$  (a), MgAl calcined at: 200 °C (b); at 300 °C (c); at 400 °C (d) and at 500 °C (e) and B)  $(Mg_2Fe(OH)_6(CO_3) \cdot 2.5H_2O$  (a), MgFe calcined at: 200 °C (b); at 300 °C (c); at 400 °C (d); and at 500 °C (e).

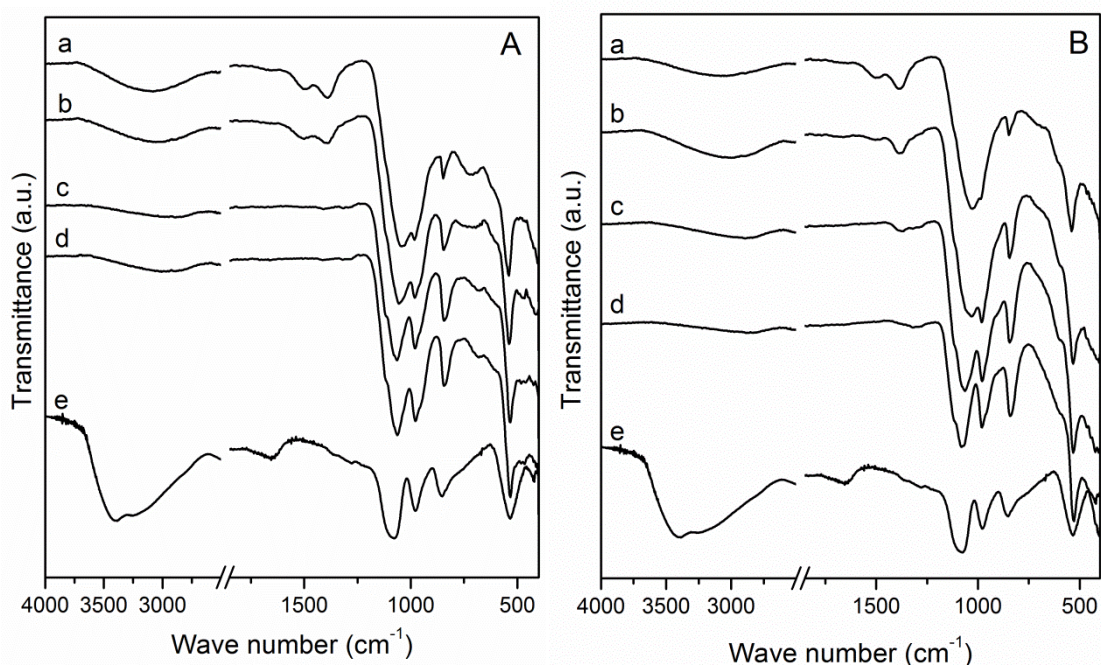

Figure S2: FTIR data of milled samples (9 h, 450 rpm) A)  $\text{MgAl}_{200}/\text{K}_2\text{HPO}_4$  (a);  $\text{MgAl}_{300}/\text{K}_2\text{HPO}_4$  (b);  $\text{MgAl}_{400}/\text{K}_2\text{HPO}_4$  (c);  $\text{MgAl}_{500}/\text{K}_2\text{HPO}_4$  (d),  $\text{K}_2\text{HPO}_4$  (e), and B)  $\text{MgFe}_{200}/\text{K}_2\text{HPO}_4$  (a);  $\text{MgFe}_{300}/\text{K}_2\text{HPO}_4$  (b);  $\text{MgFe}_{400}/\text{K}_2\text{HPO}_4$  (c);  $\text{MgFe}_{500}/\text{K}_2\text{HPO}_4$  (d),  $\text{K}_2\text{HPO}_4$  (e) with LDH/ $\text{K}_2\text{HPO}_4$  MR 1:2.

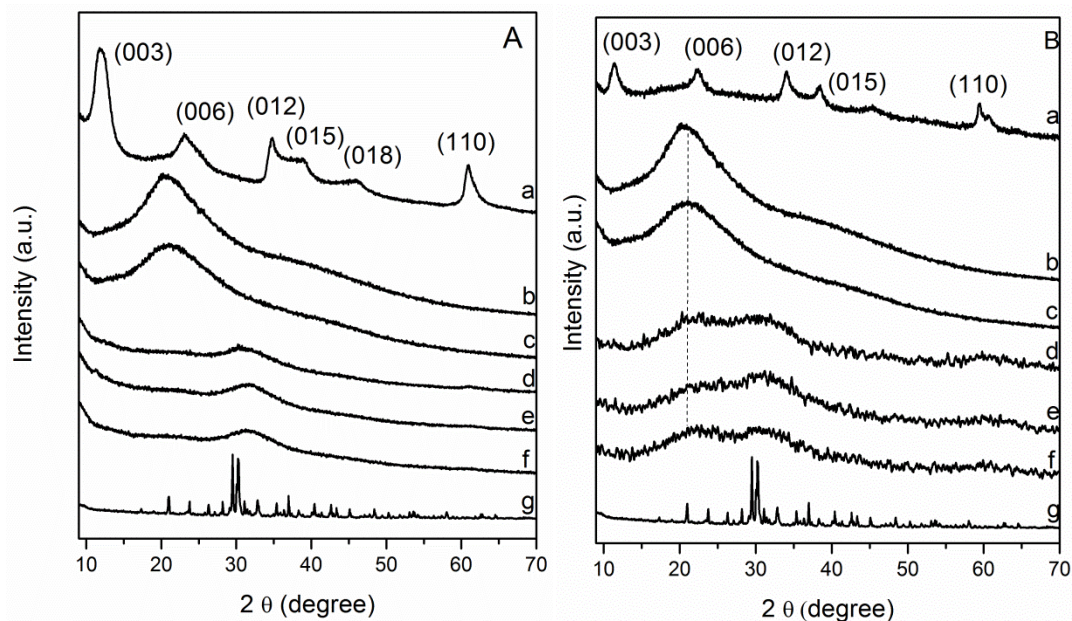

**Figure 3.** XRD for A)  $\text{MgAl}$  (a), CMC (b), CMC milled for 3 h (c) and CMC/ $\text{MgAl}_{200}/\text{K}_2\text{HPO}_4$  (Method 1) (d), CMC/ $\text{MgAl}_{200}/\text{K}_2\text{HPO}_4$  (Method 2) (e), CMC/ $\text{MgAl}_{200}/\text{K}_2\text{HPO}_4$  (Method 3) (f),  $\text{K}_2\text{HPO}_4$  (g) and B)  $\text{MgFe}$  (a), CMC (b), CMC milled for 3 h (c), CMC/ $\text{MgFe}_{200}/\text{K}_2\text{HPO}_4$  (Method 1) (d), CMC/ $\text{MgFe}_{200}/\text{K}_2\text{HPO}_4$  (Method 2) (e) and CMC/ $\text{MgFe}_{200}/\text{K}_2\text{HPO}_4$  (Method 3) (f) and  $\text{K}_2\text{HPO}_4$  (g).

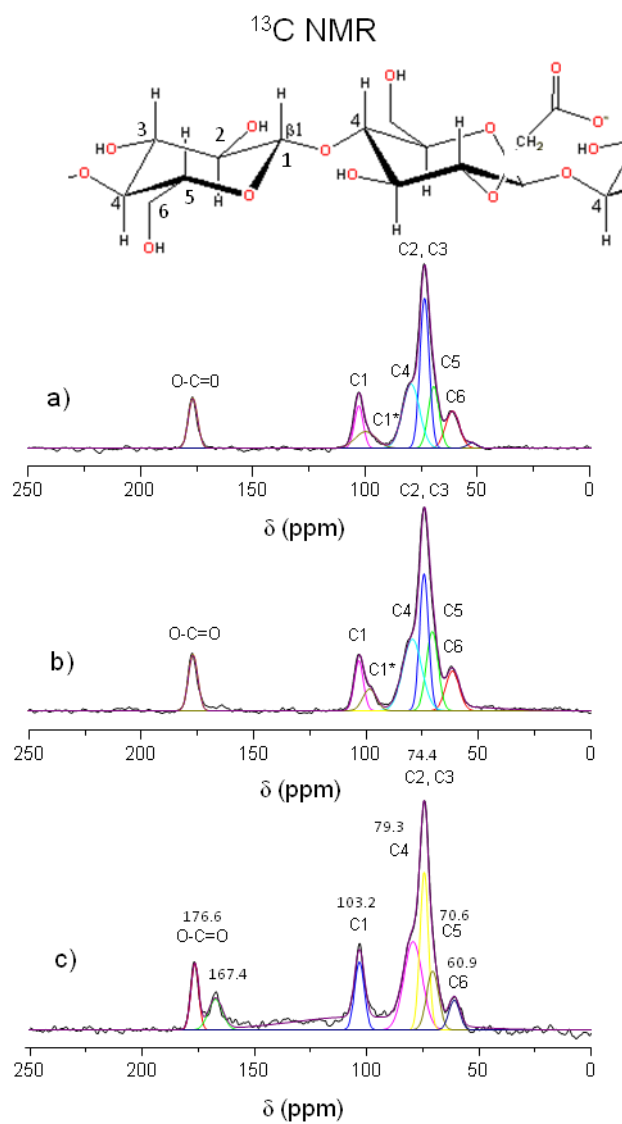

**Figure. S4:**  $^{13}\text{C}$  NMR of CMC (a); CMC milled (b); and CMC/MgAl<sub>200</sub>/K<sub>2</sub>HPO<sub>4</sub> (Method 2) (c).

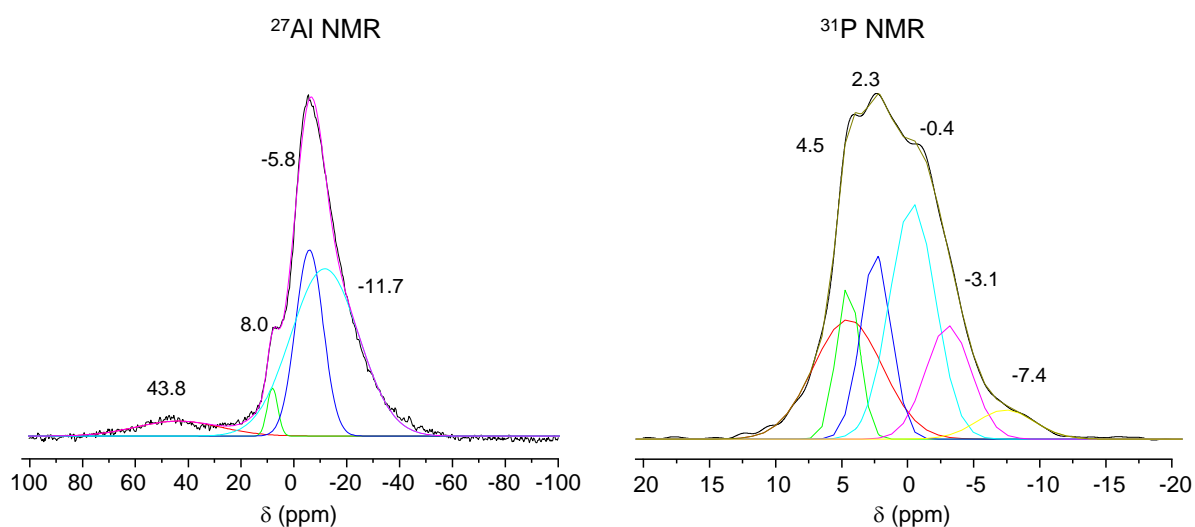

**Figure. S5:**  $^{27}\text{Al}$  and  $^{31}\text{P}$  NMR of CMC/MgAl<sub>200</sub>/K<sub>2</sub>HPO<sub>4</sub> (Method 2).

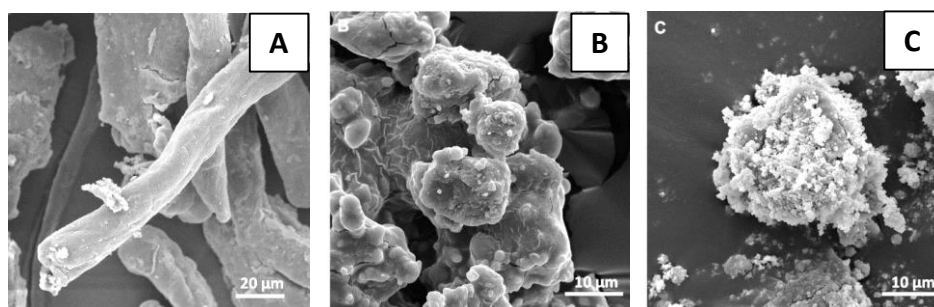

**Figure. S6:** SEM images of CMC (A), CMC milled with: MgAl<sub>200</sub>/K<sub>2</sub>HPO<sub>4</sub> (B), and MgFe<sub>200</sub>/K<sub>2</sub>HPO<sub>4</sub> (C).

**Table S1:** XRD data for struvite-K identified in MgAl<sub>200</sub>/K<sub>2</sub>HPO<sub>4</sub>.

| $2\theta$ (°) | $d_{hkl}$ (Å) | hkl |
|---------------|---------------|-----|
| 21,06         | 4,218         | 111 |
| 21,70         | 4,095         | 012 |
| 26,02         | 3,424         | 112 |
| 27,50         | 3,243         | 103 |
| 31,02         | 2,882         | 211 |
| 32,40         | 2,763         | 004 |
| 33,38         | 2,684         | 022 |
| 34,12         | 2,627         | 212 |

**Table S2.**  $^{13}\text{C}$  NMR of CMC, CMC milled, CMC/MgAl<sub>200</sub>/K<sub>2</sub>HPO<sub>4</sub> (Method 2).

| Site  | sample                                                   | $\delta$ (ppm) | I(%) |
|-------|----------------------------------------------------------|----------------|------|
| C=O   | CMC                                                      | 177.0          | 10.0 |
|       | CMC <sub>milled</sub>                                    | 176.9          | 10.9 |
|       | CMC/MgAl <sub>200</sub> /K <sub>2</sub> HPO <sub>4</sub> | 176.6          | 9.7  |
| C1    | CMC                                                      | 103.2          | 9.9  |
|       | CMC <sub>milled</sub>                                    | 103.2          | 10.8 |
|       | CMC/MgAl <sub>200</sub> /K <sub>2</sub> HPO <sub>4</sub> | 103.2          | 11.8 |
| C1*   | CMC                                                      | 100.1          | 23.5 |
|       | CMC <sub>milled</sub>                                    | 98.4           | 15.8 |
|       | CMC/MgAl <sub>200</sub> /K <sub>2</sub> HPO <sub>4</sub> | -              | -    |
| C2-C3 | CMC                                                      | 74.0           | 10.2 |
|       | CMC <sub>milled</sub>                                    | 72.2           | 10.4 |
|       | CMC/MgAl <sub>200</sub> /K <sub>2</sub> HPO <sub>4</sub> | 74.4           | 10.4 |
| C4    | CMC                                                      | 80.0           | 18.9 |
|       | CMC <sub>milled</sub>                                    | 79.4           | 22.2 |
|       | CMC/MgAl <sub>200</sub> /K <sub>2</sub> HPO <sub>4</sub> | 79.3           | 22.5 |
| C5    | CMC                                                      | 69.9           | 12.0 |
|       | CMC <sub>milled</sub>                                    | 70.6           | 13.7 |
|       | CMC/MgAl <sub>200</sub> /K <sub>2</sub> HPO <sub>4</sub> | 70.6           | 14.8 |
| C6    | CMC                                                      | 61.5           | 15.5 |
|       | CMC <sub>milled</sub>                                    | 61.6           | 16.0 |
|       | CMC/MgAl <sub>200</sub> /K <sub>2</sub> HPO <sub>4</sub> | 60.9           | 13.2 |
| C=O*  | CMC/MgAl <sub>200</sub> /K <sub>2</sub> HPO <sub>4</sub> | 167.4          | 17.5 |
